# Supplementary material for: A Facile Strategy to Prepare Small Water Clusters via Interacting with Functional Molecules
Source: MDPI journal article supplement (doi:10.3390/ijms22158250), 2021-07-31
Supplement: s1 [file s1]

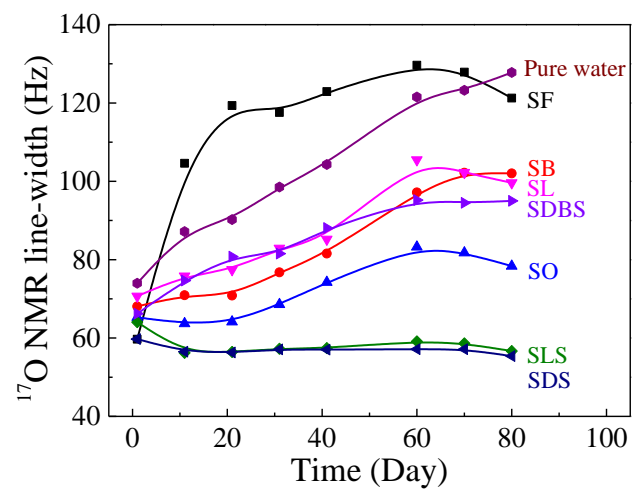

Figure S1.  $^{17}\text{O}$  NMR line-width of water system at the concentrations of 0.05 mM with time.

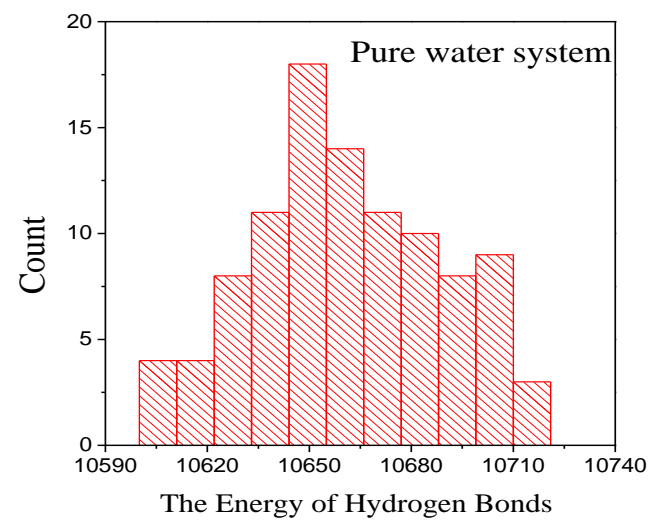

Figure S2. The histograms of energy of hydrogen bonds in pure water system.

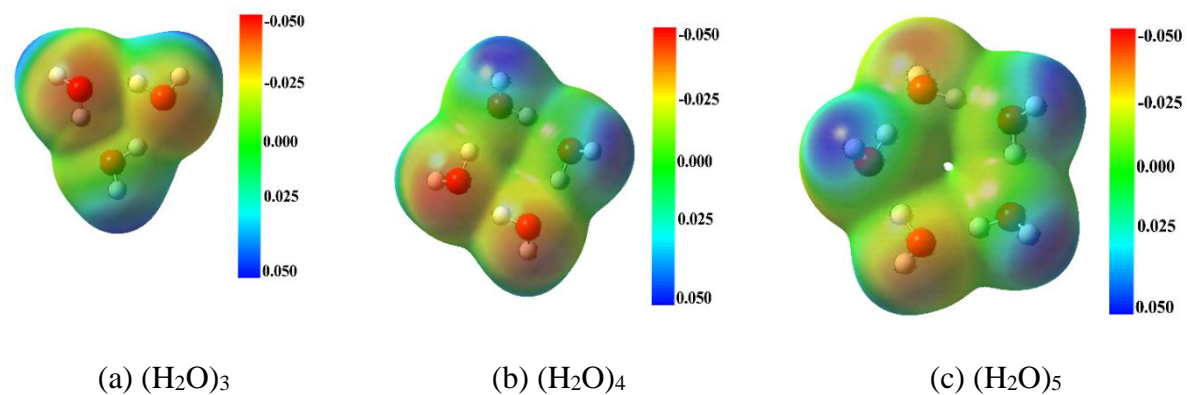

Figure S3. Electrostatic potential analysis of water clusters.

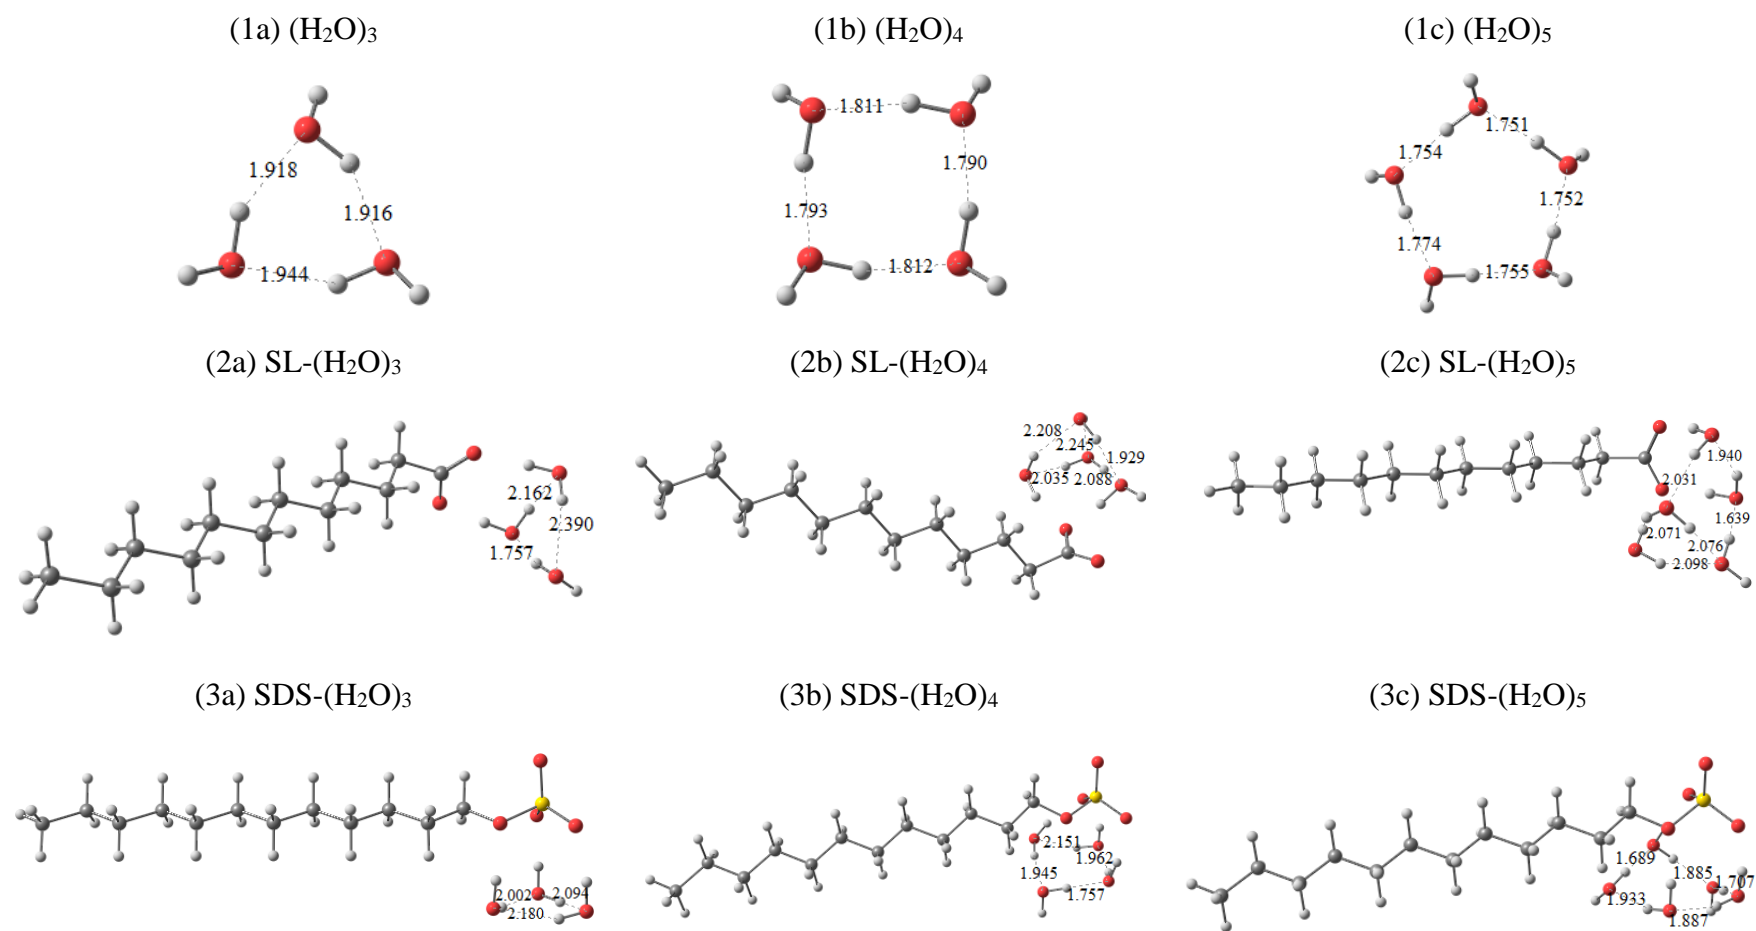

Figure S4. Optimized geometries of (H<sub>2</sub>O)<sub>n</sub>, n=3-5 (1a~c) and (H<sub>2</sub>O)<sub>n</sub>, n=3-5 with SL (2a~c) and SDS (3a~c).

SDS

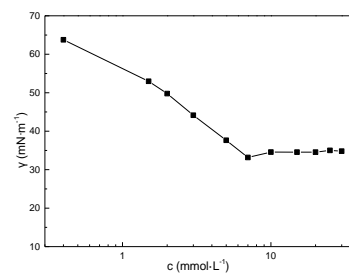

SL

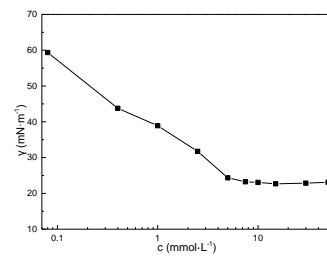

SLS

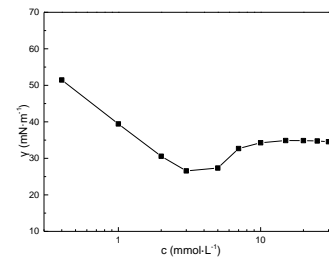

SDBS

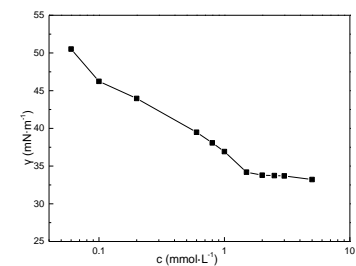

Figure S5. The critical micelle concentration of the four surfactants.

Table S1. HLB value of functional molecules calculated by the method of molecular structure.

| Abbreviation | HLB value |
|--------------|-----------|
| SDBS         | 9.450     |
| SLS          | 12.300    |
| SL           | 20.875    |
| SO           | 22.775    |
| SB           | 24.675    |
| SF           | 26.100    |
| SDS          | 40.000    |

Table S2. Elemental analysis of functional molecules.

| Functional molecule | Elemental analysis (%) Calcd | Elemental analysis (%) Found |
|---------------------|------------------------------|------------------------------|
| <b>SF</b>           | C, 17.66; H, 1.48            | C, 17.71; H, 1.50            |
| <b>SB</b>           | C, 43.64; H, 6.41            | C, 43.68; H, 6.51            |
| <b>SO</b>           | C, 57.82; H, 9.10            | C, 57.86; H, 9.30            |
| <b>SL</b>           | C, 64.84; H, 10.43           | C, 64.99; H, 10.51           |
| <b>SLS</b>          | C, 52.92; H, 9.25; S, 11.77  | C, 53.05; H, 9.31; S, 11.85  |
| <b>SDS</b>          | C, 49.98; H, 8.74; S, 11.12  | C, 50.06; H, 8.82; S, 11.22  |
| <b>SDBS</b>         | C, 62.04; H, 8.39; S, 9.20   | C, 62.11; H, 8.45; S, 9.31   |
